# Supplementary material
Source: ML conference proceedings conference paper supplement (https://proceedings.neurips.cc/paper_files/paper/2019/hash/00989c20ff1386dc386d8124ebcba1a5-Abstract.html)
Supplement: Supplementary file 3 [file 00989c20ff1386dc386d8124ebcba1a5-Supplemental.zip]

Archive with 9 entries (6 files):
- supplementary/
- supplementary/.DS_Store
- __MACOSX/
- __MACOSX/supplementary/
- __MACOSX/supplementary/._.DS_Store
- supplementary/supplementary.pdf
- __MACOSX/supplementary/._supplementary.pdf
- supplementary/video_submission8547.mp4
- __MACOSX/supplementary/._video_submission8547.mp4
